# Supplementary material for: Airborne in-situ quantification of methane emissions from oil and gas production in Romania
Source: Copernicus journal article supplement (doi:10.5194/egusphere-2024-2135), 2024-08-09
Supplement: Supplementary file 1 [file egusphere-2024-2135-supplement.pdf]

## S.1) Evaluation of meteorological conditions

The models' meteorological conditions, temperature (T), wind speed (Ws), and specific humidity (Qv), were evaluated against ERA5 and flight measurements for the Scientific Aviation (SA) flights. The evaluation was performed using direct comparison and three quantitative metrics. Table S1 shows the results of the comparison between simulated and measured meteorological parameters for the SA flights.

Table S1 - Difference between simulated and measured meteorological parameters temperature (T), wind speed (Ws) and specific humidity (Qv). Average values along the flight track are used to calculate the differences. Green color indicates that the simulation results and measurements are consistent within the thresholds, orange color indicates that simulation and measurements deviate more than the thresholds. The thresholds for the various variables are: temperature < 1.5 °C, wind speed < 0.6 m s<sup>-1</sup>, and Qv between 25<sup>th</sup> and 75<sup>th</sup> percentile.

| No | Date       | Hour          | Model - OBS |           |          |           |          |           |
|----|------------|---------------|-------------|-----------|----------|-----------|----------|-----------|
|    |            |               | T (°C)      |           | Ws (m/s) |           | Qv       |           |
|    |            |               | MECO(3)     | COSMO-GHG | MECO(3)  | COSMO-GHG | MECO(3)  | COSMO-GHG |
| 1  | 03/10/2019 | 11:49 - 15:03 | -2.1        | -1.3      | -1.0     | -1.0      | 0.00178  | 0.00069   |
| 2  | 07/10/2019 | 11:05 - 14:41 | 2.5         | -1.2      | -2.1     | -0.4      | 0.00005  | 0.00058   |
| 3  | 08/10/2019 | 06:53 - 11:38 | -1.8        | -1.2      | 1.4      | 0.4       | -0.00051 | -0.00036  |
| 4  | 09/10/2019 | 09:08 - 13:52 | -4.2        | -1.9      |          | 0.9       |          |           |
| 5  | 10/10/2019 | 08:35 - 11:47 | -2.9        | -1.9      | -0.9     | 1.5       | -0.00159 | 0.00024   |
| 6  | 11/10/2019 | 09:07 - 13:17 | -3.1        | -2.6      | 0.3      | 0.2       | 0.00096  | 0.00017   |
| 7  | 12/10/2019 | 10:05 - 14:24 | -3.9        | -2.4      | -1.7     | 0.3       | 0.00016  | 0.00061   |
| 8  | 15/10/2019 | 10:04 - 14:34 | -3.7        | -1.8      | -1.4     | -0.3      | -0.00062 | 0.00044   |
| 9  | 17/10/2019 | 10:00 - 13:43 | -0.6        | -2.5      | 0.3      | -0.1      | -0.00246 | 0.00071   |
| 10 | 18/10/2019 | 11:26 - 14:36 | -3.8        | -2.2      | -1.0     | 0.4       | -0.00024 | 0.00173   |
| 11 | 21/10/2019 | 10:57 - 14:30 | -5.6        | -1.7      | -1.7     | -1.9      | -0.00031 | -0.00131  |

In addition, three quantitative indices, the Nash-Sutcliffe Efficiency (NSE), the Kling-Gupta Efficiency (KGE) and the Mean Absolute Relative Error (MARE) were used to evaluate the performance of the models compared to reanalysis data from ERA5 and flight measurements.

NSE is calculated as one minus the ratio of the error variance of the modeled time-series divided by the variance of the reference time-series, here we use the ERA5 time-series (Nash and Sutcliffe, 1970). It is defined as:

$$NSE = 1 - \frac{\sum_{t=1}^T (Q_m^t - Q_o^t)^2}{\sum_{t=1}^T (Q_o^t - \bar{Q}_o)^2} \quad \text{Eq. S1}$$

where  $\bar{Q}_o$  is the mean of observed data,  $Q_m^t$  is model data at time  $t$ , and  $Q_o^t$  is observed data at time  $t$ .

KGE is a goodness-of-fit indicator and was developed based on a decomposition of NSE into its constitutive components (correlation, variability bias, and mean bias) (Gupta et al., 2009;Knoben et al., 2019). The KGE is calculated as follows:

$$KGE = 1 - \sqrt{(r - 1)^2 + \left(\frac{\sigma_{sim}}{\sigma_{obs}} - 1\right)^2 + \left(\frac{\mu_{sim}}{\mu_{obs}} - 1\right)^2} \quad \text{Eq. S2}$$

where  $\sigma_{obs}$  is the standard deviation in observations,  $\sigma_{sim}$  is the standard deviation in simulations,  $\mu_{sim}$  is the simulation mean,  $\mu_{obs}$  is the observation mean, and  $r$  is the linear correlation between observations and simulations.

29 MARE is a measure of absolute errors between simulation and observation time series normalized by  
 30 the observation series (Lee and Deming, 1998) and is defined as:

$$31 \quad MARE = \frac{\sum_{i=1}^N |e_i - s_i|}{\sum_{i=1}^N e_i} \quad \text{Eq. S3}$$

32 where  $N$  is the length of the simulations and evaluation periods,  $e$  is the observed series, and  $s$  is the  
 33 model series.

34 NSE equal to 1 indicates perfect correspondence between models and ERA5 (green color); NSE equal  
 35 to 0 indicates that the model simulations have the same explanatory power as the mean of the ERA5;  
 36 and  $NSE < 0$  indicates that the model is a worse predictor than the mean of the ERA5 (yellow color).  
 37 Similar to NSE, KGE equal to 1 indicates perfect agreement between models and ERA5 (green color)  
 38 a KGE score below 0 indicates poor model performance (yellow color). Unlike NSE and KGE, MARE  
 39 equal to 0 indicates a perfect fit to the observed data (ERA5, green color). There is no general threshold  
 40 to indicate poor model performance using MARE and we assess model performance as acceptable if  
 41 the MARE index lies below and equal to 0.2 (green color), otherwise model performance is assessed as  
 42 poor (yellow color). Table S2 summarizes the evaluation criteria and Table S3 and S4 shows the results  
 43 of model evaluation. It is important to note that the performance evaluation of the models in simulating  
 44 wind direction (Wdir) and cloud cover using quantitative metrics was not feasible. Therefore, we relied  
 45 on visual assessment of the simulation and reanalysis fields. For Wdir, a plus sign (dark green color)  
 46 was assigned if the models simulated Wdir similar to ERA5 within an angle  $< 30$  degrees, a circle sign  
 47 (green color) was assigned if the models simulated Wdir similar to ERA5 with an angle between 30 and  
 48 90 degrees (observed in only a few places), and a negative sign (orange color) was assigned if the  
 49 simulated Wdir significantly deviated more than 90 degrees from ERA5. Similarly for cloud cover, a  
 50 plus sign was assigned if both models and ERA5 indicated clear sky and/or if the models simulated  
 51 slightly different cloud patterns at 850 hPa compared to ERA5. A circle sign was assigned if the models  
 52 simulated slightly different cloud pattern at 850 hPa compared to ERA5 but overestimated cloud  
 53 fraction in the flight areas. Lastly, a minus sign was assigned if the models simulated different cloud  
 54 patterns during the flight times.

55 *Table S2 - Evaluation criteria for good and poor performance*

| No | Metric | Good     | Poor       |
|----|--------|----------|------------|
| 1  | NSE    | NSE = 1  | NSE < 0    |
| 2  | KGE    | KGE = 1  | KGE = 0    |
| 3  | MARE   | MARE = 0 | MARE < 0.2 |

56

57

58

59

60

61

62

63

64

65

66

67

68

69

70

71

72

73 *Table S3 - Model performance in simulating temperature (T) and wind speed (Ws)*

| No | Date       | Hour          | Model vs ERA5  |       |      |                  |       |      |                  |       |      |                    |       |      |
|----|------------|---------------|----------------|-------|------|------------------|-------|------|------------------|-------|------|--------------------|-------|------|
|    |            |               | MECO(3) T (°C) |       |      | COSMO-GHG T (°C) |       |      | MECO(3) Ws (m/s) |       |      | COSMO-GHG Ws (m/s) |       |      |
|    |            |               | NSE            | KGE   | MARE | NSE              | KGE   | MARE | NSE              | KGE   | MARE | NSE                | KGE   | MARE |
| 1  | 01/10/2019 | 10:57 - 14:00 | -5.79          | 0.85  | 0.14 | 0.69             | 0.81  | 0.03 | -15.69           | -1.82 | 0.52 | -10.81             | -1.24 | 0.48 |
| 2  | 02/10/2019 | 10:05 - 12:36 | -4.16          | 0.75  | 0.14 | -0.85            | 0.68  | 0.07 | -18.13           | -1.13 | 0.47 | -12.04             | -1.30 | 0.45 |
| 3  | 03/10/2019 | 08:10 - 11:25 | -3.00          | 0.78  | 0.15 | -1.06            | 0.88  | 0.11 | -265.51          | -2.13 | 1.98 | -30.56             | -2.85 | 0.55 |
| 4  | 03/10/2019 | 12:58 - 15:15 | -83.85         | -0.05 | 0.12 | -39.61           | -0.51 | 0.08 | 0.37             | 0.61  | 0.10 | 0.07               | 0.56  | 0.13 |
| 5  | 06/10/2019 | 07:34 - 11:22 | 0.46           | 0.83  | 0.06 | 0.00             | 0.86  | 0.09 | -0.22            | 0.37  | 0.30 | -0.19              | 0.59  | 0.36 |
| 6  | 07/10/2019 | 10:02 - 14:22 | -36.37         | 0.42  | 0.57 | -3.26            | 0.70  | 0.19 | -6.24            | -0.06 | 0.33 | -2.15              | 0.32  | 0.22 |
| 7  | 09/10/2019 | 07:22 - 09:53 | -9.48          | 0.51  | 0.24 | -1.58            | 0.49  | 0.11 | -12.28           | -0.23 | 0.39 | -11.03             | -0.23 | 0.39 |
| 8  | 10/10/2019 | 08:15 - 11:43 | 0.79           | 0.68  | 0.10 | 0.82             | 0.78  | 0.10 | 0.48             | 0.75  | 0.25 | -0.38              | 0.51  | 0.41 |
| 9  | 11/10/2019 | 08:48 - 11:52 | 0.56           | 0.93  | 0.04 | 0.69             | 0.66  | 0.03 | -7.28            | -0.34 | 0.49 | -2.09              | -0.12 | 0.23 |
| 10 | 12/10/2019 | 09:31 - 11:25 | -1.97          | 0.84  | 0.08 | -0.92            | 0.51  | 0.06 | -9.14            | 0.30  | 0.48 | -1.21              | 0.11  | 0.17 |
| 11 | 14/10/2019 | 09:15 - 12:21 | -1.37          | 0.80  | 0.10 | 0.07             | 0.50  | 0.04 | -3.68            | -0.03 | 0.28 | -2.68              | 0.55  | 0.29 |
| 12 | 17/10/2019 | 09:39 - 13:31 | 0.51           | 0.63  | 0.08 | 0.58             | 0.81  | 0.07 | -17.77           | -2.57 | 0.66 | -16.54             | -2.29 | 0.65 |
| 13 | 23/10/2019 | 09:21 - 13:45 | -4.29          | 0.76  | 0.14 | -1.36            | 0.06  | 0.07 | -2.29            | 0.01  | 0.19 | -3.83              | -0.41 | 0.23 |
| 14 | 03/10/2019 | 11:49 - 15:03 | -3.77          | 0.69  | 0.13 | -1.65            | 0.80  | 0.09 | -0.48            | 0.35  | 0.21 | -0.53              | 0.54  | 0.22 |
| 15 | 07/10/2019 | 11:05 - 14:41 | -13.85         | 0.27  | 0.72 | 0.52             | 0.87  | 0.13 | -14.64           | -0.73 | 0.29 | -0.97              | 0.32  | 0.09 |
| 16 | 08/10/2019 | 06:53 - 11:38 | 0.71           | 0.72  | 0.11 | 0.47             | 0.83  | 0.17 | -3.32            | 0.00  | 0.76 | -0.19              | 0.55  | 0.40 |
| 17 | 09/10/2019 | 09:08 - 13:52 | -4.35          | 0.60  | 0.22 | 0.39             | 0.63  | 0.06 |                  |       |      | -0.91              | 0.33  | 0.22 |
| 18 | 10/10/2019 | 08:35 - 11:47 | 0.72           | 0.69  | 0.12 | 0.84             | 0.77  | 0.10 | 0.62             | 0.76  | 0.32 | 0.50               | 0.66  | 0.33 |
| 19 | 11/10/2019 | 09:07 - 13:17 | 0.95           | 0.82  | 0.04 | 0.93             | 0.87  | 0.04 | -6.94            | -0.91 | 0.53 | -7.59              | -0.88 | 0.59 |
| 20 | 12/10/2019 | 10:05 - 14:24 | -0.34          | 0.80  | 0.10 | 0.53             | 0.52  | 0.06 | -3.85            | 0.13  | 0.35 | -1.50              | 0.12  | 0.24 |
| 21 | 15/10/2019 | 10:04 - 14:34 | -2.22          | -0.15 | 0.09 | 0.66             | 0.90  | 0.03 | -2.87            | 0.23  | 0.36 | 0.24               | 0.67  | 0.14 |
| 22 | 17/10/2019 | 10:00 - 13:43 | -0.34          | -0.10 | 0.05 | -3.17            | 0.60  | 0.10 | -24.02           | -1.83 | 1.17 | -6.74              | -0.03 | 0.83 |
| 23 | 18/10/2019 | 11:26 - 14:36 | -5.40          | 0.79  | 0.15 | -0.43            | 0.69  | 0.07 | -9.49            | -1.18 | 0.63 | -21.56             | -0.99 | 1.03 |
| 24 | 21/10/2019 | 10:57 - 14:30 | -17.74         | 0.57  | 0.22 | 0.52             | 0.64  | 0.03 | -0.87            | -0.02 | 0.29 | -1.55              | 0.06  | 0.37 |

74

75 *Table S4 - Model performance in simulating wind direction (Wdir), cloud cover, and humidity (Qv)*

| No | Date       | Hour          | Model vs ERA5 |       |           |       |            |       |      |              |       |      |
|----|------------|---------------|---------------|-------|-----------|-------|------------|-------|------|--------------|-------|------|
|    |            |               | MECO(3)       |       | COSMO-GHG |       | MECO(3) Qv |       |      | COSMO-GHG Qv |       |      |
|    |            |               | Wdir          | Cloud | Wdir      | Cloud | NSE        | KGE   | MARE | NSE          | KGE   | MARE |
| 1  | 01/10/2019 | 10:57 - 14:00 | +             | +     | o         | +     | -13.96     | -0.17 | 0.26 | -13.29       | -0.48 | 0.25 |
| 2  | 02/10/2019 | 10:05 - 12:36 | +             | +     | +         | +     | -2.41      | 0.81  | 0.08 | -8.65        | 0.38  | 0.13 |
| 3  | 03/10/2019 | 08:10 - 11:25 | +             | +     | +         | +     | -3.34      | -0.74 | 0.09 | -1.92        | -0.65 | 0.07 |
| 4  | 03/10/2019 | 12:58 - 15:15 | o             | +     | o         | +     | -74.51     | -0.07 | 0.19 | -18.99       | -0.93 | 0.09 |
| 5  | 06/10/2019 | 07:34 - 11:22 | -             | -     | +         | -     | -2.31      | 0.24  | 0.09 | -0.69        | 0.35  | 0.06 |
| 6  | 07/10/2019 | 10:02 - 14:22 | -             | -     | +         | o     | -12.49     | -0.15 | 0.08 | -3.69        | -0.04 | 0.04 |
| 7  | 09/10/2019 | 07:22 - 09:53 | +             | +     | +         | +     | -40.59     | -0.12 | 0.16 | -4.14        | -0.45 | 0.05 |
| 8  | 10/10/2019 | 08:15 - 11:43 | +             | -     | +         | +     | -32.48     | -0.04 | 0.36 | -3.21        | 0.01  | 0.11 |
| 9  | 11/10/2019 | 08:48 - 11:52 | o             | o     | o         | o     | -3.86      | 0.42  | 0.14 | -1.25        | 0.49  | 0.08 |
| 10 | 12/10/2019 | 09:31 - 11:25 | o             | +     | +         | +     | -10.29     | -0.33 | 0.14 | -9.35        | -0.44 | 0.12 |
| 11 | 14/10/2019 | 09:15 - 12:21 |               | +     | +         | +     | -0.59      | 0.01  | 0.05 | -6.04        | -0.11 | 0.10 |
| 12 | 17/10/2019 | 09:39 - 13:31 |               | +     | o         | +     | -0.43      | 0.56  | 0.11 | -0.76        | 0.34  | 0.13 |
| 13 | 23/10/2019 | 09:21 - 13:45 |               |       |           |       | -0.54      | 0.14  | 0.08 | -1.60        | 0.27  | 0.12 |
| 14 | 03/10/2019 | 11:49 - 15:03 | -             | +     | +         | +     | -55.89     | -0.96 | 0.19 | -17.37       | -2.27 | 0.09 |
| 15 | 07/10/2019 | 11:05 - 14:41 | -             | o     | +         | o     | -6.16      | -0.19 | 0.09 | -25.63       | 0.41  | 0.18 |
| 16 | 08/10/2019 | 06:53 - 11:38 | -             | -     | o         | +     | -11.74     | 0.09  | 0.12 | -7.75        | -0.03 | 0.09 |
| 17 | 09/10/2019 | 09:08 - 13:52 | +             | +     | +         | +     |            |       |      | -1.51        | 0.13  | 0.09 |
| 18 | 10/10/2019 | 08:35 - 11:47 | +             | -     | +         | +     | -41.45     | -0.99 | 0.33 | -2.63        | -0.19 | 0.07 |
| 19 | 11/10/2019 | 09:07 - 13:17 | o             | o     | o         | o     | -2.22      | 0.31  | 0.19 | 0.40         | 0.68  | 0.08 |
| 20 | 12/10/2019 | 10:05 - 14:24 | o             | +     | +         | +     | -4.47      | -0.49 | 0.16 | -7.89        | 0.15  | 0.21 |
| 21 | 15/10/2019 | 10:04 - 14:34 | +             | +     | o         | +     | 0.41       | 0.61  | 0.11 | -1.09        | 0.42  | 0.21 |
| 22 | 17/10/2019 | 10:00 - 13:43 |               | +     | -         | +     | -11.21     | 0.19  | 0.29 | -3.00        | 0.43  | 0.16 |
| 23 | 18/10/2019 | 11:26 - 14:36 | -             | +     | -         | +     | 0.42       | 0.56  | 0.06 | -10.82       | 0.45  | 0.31 |
| 24 | 21/10/2019 | 10:57 - 14:30 |               |       |           |       | -0.04      | 0.45  | 0.09 | -0.39        | 0.52  | 0.10 |

76

77 After we evaluated the models' performance in simulating the meteorological conditions during flights,  
 78 we investigated the simulation-measurement comparison for the individual flights for similar  
 79 parameters. We assign a plus sign (green) for good model performance, a circle sign (yellow) for  
 80 acceptable model performance, and a minus sign (red) for poor models' performance. The assignment

81 of the model performance (red, yellow, and green) was based on the three quantitative indices (NSE,  
 82 KGE, and MARE, see above). Green if at least 2 metrics show good agreement between model and  
 83 ERA5, yellow if one metric shows good agreement, and red if none of the metrics shows good  
 84 agreement. For Wdir and cloud cover, we simply used the evaluation results outlined in Table S4. Table  
 85 S5 shows the summary of the evaluation of the models' outputs during the flight measurement dates.

86 *Table S5 - Summary of the models' evaluation*

| No | Date       | Region                  | MECO(3)   |            |    |       |    | COSMO-GHG |       |    |       |    |
|----|------------|-------------------------|-----------|------------|----|-------|----|-----------|-------|----|-------|----|
|    |            |                         | Parameter |            |    |       |    | Parameter |       |    |       |    |
|    |            |                         | T         | Cloud      | Ws | W dir | Qv | T         | Cloud | Ws | W dir | Qv |
| 1  | 01/10/2019 | 6                       | o         | +          | -  | +     | -  | +         | +     | o  | o     | -  |
| 2  | 02/10/2019 | 7                       | o         | +          | -  | +     | +  | +         | +     | o  | +     | +  |
| 3  | 03/10/2019 | 4                       | o         | +          | -  | +     | o  | o         | +     | o  | +     | o  |
| 4  | 03/10/2019 | 5a                      | -         | +          | +  | o     | -  | -         | +     | +  | o     | o  |
| 5  | 06/10/2019 | 4                       | +         | -          | o  | -     | +  | +         | -     | o  | +     | +  |
| 6  | 07/10/2019 | 5a                      | -         | -          | -  | -     | o  | o         | o     | -  | +     | o  |
| 7  | 09/10/2019 | 7                       | -         | +          | -  | +     | o  | +         | +     | -  | +     | o  |
| 8  | 10/10/2019 | 11                      | +         | -          | o  | +     | -  | +         | +     | -  | +     | o  |
| 9  | 11/10/2019 | 8                       | +         | o          | -  | o     | o  | +         | o     | o  | o     | o  |
| 10 | 12/10/2019 | 6                       | +         | +          | o  | o     | o  | +         | +     | +  | +     | o  |
| 11 | 14/10/2019 | 8                       | o         | +          | -  |       | o  | +         | +     | o  | +     | -  |
| 12 | 17/10/2019 | 15-16                   | +         | +          | -  |       | +  | +         | -     | o  | o     | o  |
| 13 | 23/10/2019 | 6-7                     | o         |            | o  |       | o  | o         |       | +  |       | o  |
| 14 | 03/10/2019 | 4.4, 4.5, 4.6           | o         | +          | o  | -     | -  | +         | +     | o  | +     | o  |
| 15 | 07/10/2019 | 8, 8.1                  | -         | o          | -  | -     | o  | +         | o     | +  | +     | o  |
| 16 | 08/10/2019 | 5a                      | +         | -          | -  | -     | +  | +         | +     | o  | o     | o  |
| 17 | 09/10/2019 | 7, 7.5                  | -         | +          |    | +     |    | +         | +     | o  | +     |    |
| 18 | 10/10/2019 | 11                      | +         | -          | o  | +     | o  | +         | +     | o  | +     | o  |
| 19 | 11/10/2019 | 4.2, 4.3, 4.4, 4.5, 4.6 | +         | o          | -  | o     | -  | +         | o     | -  | o     | +  |
| 20 | 12/10/2019 | 7, 6.5                  | o         | +          | o  | o     | o  | +         | +     | o  | +     | -  |
| 21 | 15/10/2019 | 5a                      | -         | +          | o  | +     | +  | +         | +     | +  | o     | -  |
| 22 | 17/10/2019 | 6.2-6.7                 | o         | +          | -  |       | o  | o         | +     | -  | -     | o  |
| 23 | 18/10/2019 | 7.2, 7.3, 7.4, 7.8      | o         | +          | o  | -     | +  | +         | +     | -  | -     | -  |
| 24 | 21/10/2019 | 7c, 7.1, 6.1, 7.8       | -         |            | o  |       | +  | +         |       | o  |       | +  |
|    |            |                         |           |            |    |       |    |           |       |    |       |    |
|    |            |                         |           | No data    |    |       |    |           |       |    |       |    |
|    |            |                         |           | Good       |    |       |    |           |       |    |       |    |
|    |            |                         |           | Acceptable |    |       |    |           |       |    |       |    |
|    |            |                         |           | Poor       |    |       |    |           |       |    |       |    |

87

88

89

90 S.2) Measured and simulated plume areas from the  
 91 mass balance flights (zoomed in figures)

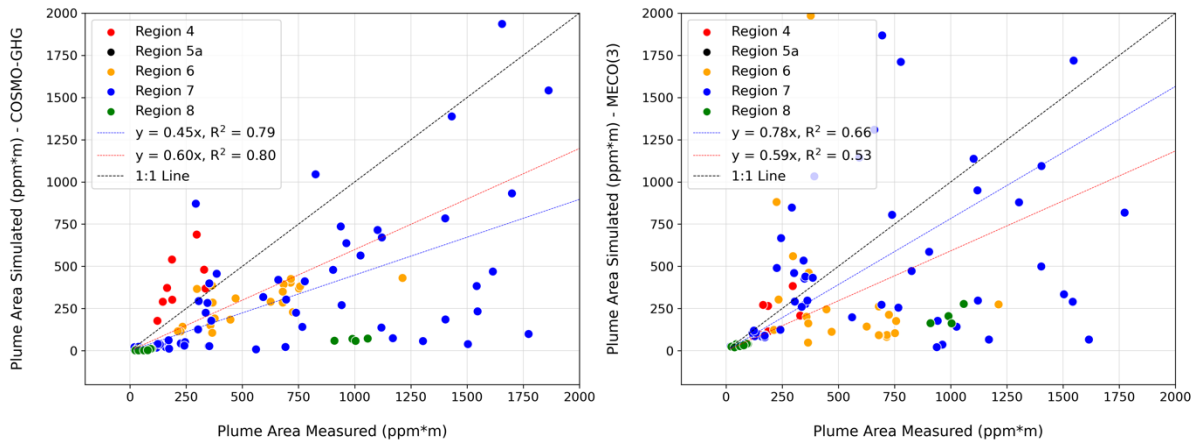

92  
 93 *Figure S1 - Comparisons between plume areas calculated from measurements and simulations with the*  
 94 *COSMO-GHG model (left) and MECO(3) model (right). Blue dashed lines show linear fits to all data*  
 95 *and red dashed lines linear fits to the plumes from the clusters only, without the points from the larger*  
 96 *regions.*

97 S.3) Major farm and landfill methane emitters within the  
 98 study areas from the E-PRTR/IED inventory

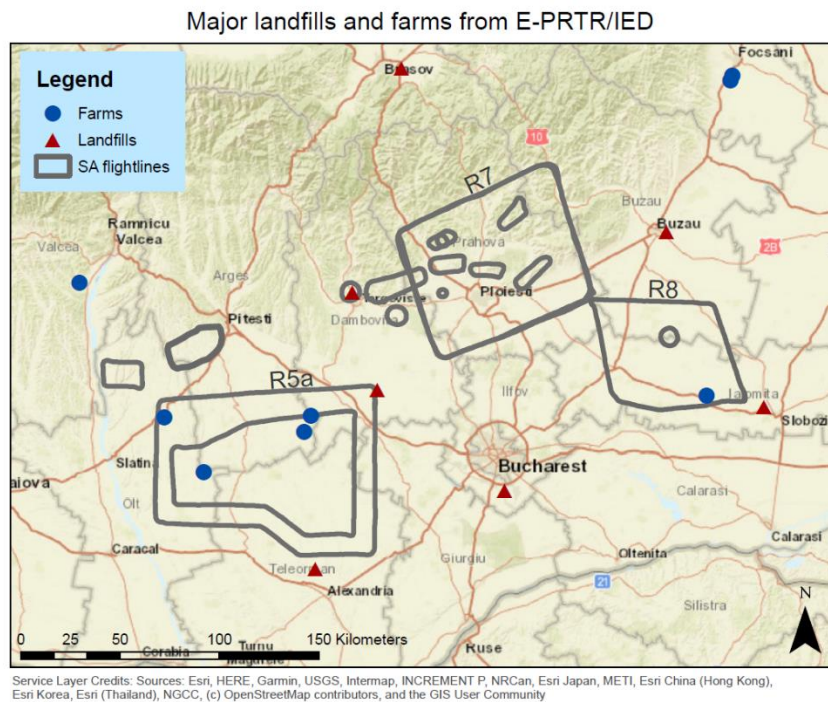

99  
 100 *Figure S2 - Location of farms and landfills with significant methane emissions from the E-PRTR/IED*  
 101 *inventory within the flightpaths of the mass balance flights.*

102 **S.4) Measured emission rates (ER) and estimates of the**  
103 **O&G related fraction of total CH<sub>4</sub> emissions in target**  
104 **regions and clusters using the EDGAR inventory.**

105 *Table S6 - Measured emission rates (ER) and estimates of the O&G related fraction of total CH<sub>4</sub>*  
106 *emissions in target regions and clusters. “Non-O&G emissions (kg hr<sup>-1</sup>)” are extracted from the*  
107 *EDGAR inventory for the target regions and are used to derive ERs from the O&G industry in the area*  
108 *(column O&G emissions). The last column shows the emission factor (kg CH<sub>4</sub> hr<sup>-1</sup> site<sup>-1</sup>). Numbers in*  
109 *bold are used for upscaling to the national scale (see text for details).*

| Flight ID                      | Target region/cluster | # facilities | # wells | Total Emissions (kg hr <sup>-1</sup> ) | Non-O&G emissions (kg hr <sup>-1</sup> ) | O&G emissions (kg hr <sup>-1</sup> ) | EF (kg h <sup>-1</sup> site <sup>-1</sup> ) |
|--------------------------------|-----------------------|--------------|---------|----------------------------------------|------------------------------------------|--------------------------------------|---------------------------------------------|
| SA01                           | R7                    | 496          | 337     | 8517 ± 2097                            | 1903                                     | 6614 ± 2097                          | 13.3 ± 4.2                                  |
| SA02                           | R7                    | 504          | 343     | 8335 ± 1440                            | 1958                                     | 6377 ± 1440                          | 12.7 ± 2.9                                  |
| SA03                           | R5a                   | 827          | 654     | 4556 ± 2570                            | 808                                      | 3748 ± 2570                          | 4.6 ± 3.1                                   |
| SA04                           | R5a-small             | 818          | 642     | 2920 ± 935                             | 367                                      | 2553 ± 935                           | 3.1 ± 1.1                                   |
| SA05                           | R6C2C3C4              | 471          | 379     | 1729 ± 912                             | -                                        | 1729 ± 912                           | 3.7 ± 1.9                                   |
| SA06                           | R7C3C4                | 124          | 92      | 1481 ± 287                             | -                                        | 1481 ± 287                           | 11.9 ± 2.3                                  |
| SA07                           | R7C2                  | 71           | 44      | 1395 ± 546                             | -                                        | 1395 ± 546                           | 19.6 ± 7.7                                  |
| SA08                           | R7VentArea            | 67           | 41      | 602 ± 209                              | -                                        | 602 ± 209                            | 9.0 ± 3.1                                   |
| SA09                           | R4C5                  | 390          | 347     | 477 ± 106                              | -                                        | 477 ± 106                            | 1.2 ± 0.3                                   |
| SA10                           | R6C6                  | 29           | 16      | 469 ± 170                              | 56†                                      | 413 ± 170                            | 14.2 ± 5.9                                  |
| SA11                           | R7Vent                | 37           | 20      | 266 ± 113                              | -                                        | 266 ± 113                            | 7.2 ± 3.1                                   |
| SA12                           | R7C5                  | 59           | 45      | 259 ± 47                               | -                                        | 259 ± 47                             | 4.4 ± 0.8                                   |
| SA13                           | R4C2C3                | 247          | 186     | 246 ± 89                               | -                                        | 246 ± 89                             | 1.0 ± 0.4                                   |
| SA14                           | R6C5                  | 27           | 21      | 131 ± 85                               | -                                        | 131 ± 85                             | 4.9 ± 3.1                                   |
| SA16                           | R8C1                  | 29           | 19      | 90 ± 49                                | -                                        | 90 ± 49                              | 3.1 ± 1.7                                   |
| SA17                           | R7C8                  | 48           | 43      | 78 ± 101                               | -                                        | 78 ± 101                             | 1.6 ± 2.1                                   |
| SA18                           | R7C1Facility          | 8            | 5       | 13 ± 9                                 | -                                        | 13 ± 9                               | 1.6 ± 1.1                                   |
| Weighted mean, everything      |                       | 4358         | 3303    | 31667 ± 10039                          | *, †                                     | 26472 ± 9765                         | 6.1 ± 2.2                                   |
| No double counting             |                       | 2516         | 1956    |                                        | *, †, ††                                 | 12732 ± 4932                         | 5.1 ± 2.0                                   |
| Sum of clusters in R7          |                       | 377          | 270     |                                        |                                          | 3828 ± 1199                          | 10.2 ± 3.2                                  |
| Only clusters with 100% fossil |                       | 1570         | 1238    |                                        |                                          | 6970 ± 2610                          | 4.4 ± 1.7                                   |

\* considering the absolute non-O&G emissions from the EDGAR inventory for the large regions and 100% O&G contribution for the clusters

† accounting for landfill within R6C6

†† excluding cluster quantifications in R7

111 S.5) Emission rate estimates for the ROME0 regions  
 112 from EDGAR and TNO-CAMS inventories.

113 *Table S7 - Emission rate estimates for non-O&G and O&G sources for the ROME0 regions using the*  
 114 *EDGAR and TNO-CAMS inventories. The non-O&G emissions are aggregated emissions from all*  
 115 *sectors other than O&G.*

| Region | EDGAR                |                          |                        | TNO-CAMS             |                          |                        |
|--------|----------------------|--------------------------|------------------------|----------------------|--------------------------|------------------------|
|        | O&G emissions [kg/h] | Non-O&G emissions [kg/h] | Total emissions [kg/h] | O&G emissions [kg/h] | Non-O&G emissions [kg/h] | Total emissions [kg/h] |
| 2      | 20                   | 892                      | 912                    | 1001                 | 799                      | 1799                   |
| 4      | 103                  | 1365                     | 1468                   | 853                  | 818                      | 1671                   |
| 5a     | 24                   | 482                      | 506                    | 116                  | 521                      | 637                    |
| 6      | 11                   | 1307                     | 1318                   | 708                  | 1094                     | 1802                   |
| 7      | 73                   | 1461                     | 1534                   | 3112                 | 1020                     | 4133                   |
| 8      | 7                    | 951                      | 959                    | 177                  | 420                      | 597                    |

116  
 117
